# Supplementary material
Source: PubMed Central journal article supplement (PMC4136017)
Supplement: AAC.02686-14_zac008143107so1.pdf [file AAC.02686-14_zac008143107so1.pdf]

**Table S1. Predicted proteins associated with DAP resistance in *E. faecium* strains**

| <b><i>E. faecium</i> DO</b> |                  |                         | <b>Presumptive annotation /Comments</b>                                                                                                                                                                                                                                                    | <b>Species</b>                                                                                                             | <b>Ref.</b> |
|-----------------------------|------------------|-------------------------|--------------------------------------------------------------------------------------------------------------------------------------------------------------------------------------------------------------------------------------------------------------------------------------------|----------------------------------------------------------------------------------------------------------------------------|-------------|
| <b>Locus</b>                | <b>Locus Tag</b> | <b>Accession Number</b> |                                                                                                                                                                                                                                                                                            |                                                                                                                            |             |
| LiaF                        | HMPREF0351_10936 | YP_006375542            | Cell wall-active antibiotics response protein_LiaF/YvqF<br>A group of cell wall-active antibiotic response proteins, including LiaF and YvqF types.                                                                                                                                        | <i>S. mutants</i><br><i>S.pneumoniae</i><br><i>B. subtilis</i><br><i>S. aureus</i>                                         | (1)         |
| LiaS                        | HMPREF0351_10937 | YP_006375543            | Signal transduction histidine kinase, LiaS<br>Two-component sensor responding to cell wall stress.                                                                                                                                                                                         | <i>S. mutants</i><br><i>S.pneumoniae</i><br><i>B. subtilis</i><br><i>S. aureus</i>                                         | (1)         |
| LiaR                        | HMPREF0351_10938 | YP_006375544            | Response regulator domain VraR/LiaR<br>Two-component response regulator [YvqE] responding to cell wall stress.                                                                                                                                                                             | <i>S. mutants</i><br><i>S.pneumoniae</i><br><i>B. subtilis</i><br><i>S. aureus</i>                                         | (1)         |
| Cls                         | HMPREF0351_11068 | YP_006375674            | Putative cardiolipin synthetase<br>Cardiolipin synthases that belong to the phospholipase D family. These enzymes catalyze the reversible ttransfer of one phosphatidyl group from one phosphatidylglycerol molecule to another to form cardiolipin (diphosphatidylglycerol) and glycerol. | <i>E.faecium.</i><br><i>E.faecalis</i><br><i>E. hiraе</i><br><i>E. mundtii</i><br><i>E. durans</i><br><i>E. villorum</i>   | (1)         |
| GdpD                        | HMPREF0351_11730 | YP_006376336            | Glycerophosphodiester phosphodiesterase family protein<br>This subfamily corresponds to the glycerophosphodiester phosphodiesterase domain (GDPD) present in uncharacterized bacterial glycerophosphodiester phosphodiesterases.                                                           | <i>E.faecium.</i><br><i>E.faecalis</i><br><i>E. villorum</i><br><i>E. hiraе</i><br><i>E. mundtii</i><br><i>E. durans</i>   | (1)         |
| Cfa                         | HMPREF0351_11433 | YP_006376039            | Cyclopropane-fatty-acyl-phospholipid synthase<br>Fatty-acyl-phospholipid/mycolic acid cyclopropane synthase                                                                                                                                                                                | <i>E. faecium.</i><br><i>E. durans</i>                                                                                     | (2)         |
| PTS-EIIA                    | HMPREF0351_11023 | YP_006375629            | Phosphotransferase system, phosphoenolpyruvate-dependent sugar EIIA 2                                                                                                                                                                                                                      |                                                                                                                            | (2)         |
| YycF/WalR/VicR              | HMPREF0351_12362 | YP_006376968            | Response regulator transcriptional regulatory protein WalR/yycF                                                                                                                                                                                                                            | <i>E. faecium.</i><br><i>E. faecalis</i><br><i>E. villorum</i><br><i>E. hiraе</i><br><i>E. mundtii</i><br><i>E. durans</i> | (2)         |
| YycG/Walk/VicK              | HMPREF0351_12361 | YP_006376967            | Signal transduction histidine                                                                                                                                                                                                                                                              |                                                                                                                            | (2)         |

|                                                     |                  |              |                                                                                                                                                                                                                                                                                                                                                                                                                                                                                      |                                      |     |
|-----------------------------------------------------|------------------|--------------|--------------------------------------------------------------------------------------------------------------------------------------------------------------------------------------------------------------------------------------------------------------------------------------------------------------------------------------------------------------------------------------------------------------------------------------------------------------------------------------|--------------------------------------|-----|
|                                                     |                  |              | kinase domain protein yycFG<br>Vick/walk                                                                                                                                                                                                                                                                                                                                                                                                                                             |                                      |     |
| YycH                                                | HMPREF0351_12360 | YP_006376966 | YycH protein<br>YycH plays a role in signal transduction and is found immediately downstream of the essential histidine kinase YycG.                                                                                                                                                                                                                                                                                                                                                 |                                      | (2) |
| YycI                                                | HMPREF0351_12359 | YP_006376965 | YycI protein<br>Regulatory protein                                                                                                                                                                                                                                                                                                                                                                                                                                                   |                                      | (2) |
| YycJ                                                | HMPREF0351_12358 | YP_006376964 | Metallo-beta-lactamase YycJ<br>Metal-dependent hydrolases of the beta-lactamase superfamily I                                                                                                                                                                                                                                                                                                                                                                                        |                                      | (2) |
| HD Domain protein                                   | HMPREF0351_11908 | YP_006376514 | HD domain protein<br>The HD domain is found in a superfamily of enzymes with a predicted or known phosphohydrolase activity. These enzymes appear to be involved in nucleic acid metabolism, signal transduction and possibly other functions in bacteria, archaea and eukaryotes. The fact that all the highly conserved residues in the HD superfamily are histidines or aspartates suggests that coordination of divalent cations is essential for the activity of these proteins | <i>E. faecium</i>                    | (2) |
| SulP                                                | HMPREF0351_10763 | YP_006375369 | Sulphate transporter<br>A number of proteins involved in the transport of sulphate across the cell membrane                                                                                                                                                                                                                                                                                                                                                                          | <i>E. faecium</i>                    | (2) |
| XpaC                                                | HMPREF0351_10542 | YP_006375148 | 5-bromo-4-chloroindolyl phosphate hydrolysis protein<br>Members of this family of prokaryotic proteins mediate the hydrolysis of 5-bromo-4-chloroindolyl phosphate bonds                                                                                                                                                                                                                                                                                                             | <i>E. faecium</i>                    | (2) |
| RrmA                                                | HMPREF0351_12412 | YP_006377018 | rRNA (guanine-N1-)-methyltransferase A, predicted protein<br>These enzymes specifically methylate the guanosine residue m1G in 23S rRNA.                                                                                                                                                                                                                                                                                                                                             | <i>E. faecium</i>                    | (2) |
| BetaFructuronidase (Glycoside hydrolase, family 32) | HMPREF0351_11791 | YP_006376397 | Glycoside hydrolase, family 32 (GH32).<br>GH32 enzymes cleave sucrose into fructose and glucose via beta-fructofuranosidase activity, producing an invert sugar that is a mixture of dextrorotatory D-glucose and levorotatory D-                                                                                                                                                                                                                                                    | <i>E. faecium</i><br><i>E. avium</i> | (3) |

|                                                 |                  |              |                                                                                                                                                                                                                                                                                         |                                                                               |     |
|-------------------------------------------------|------------------|--------------|-----------------------------------------------------------------------------------------------------------------------------------------------------------------------------------------------------------------------------------------------------------------------------------------|-------------------------------------------------------------------------------|-----|
|                                                 |                  |              | fructose, thus named invertase                                                                                                                                                                                                                                                          |                                                                               |     |
| PTS-IIA                                         | HMPREF0351_11792 | YP_006376398 | PTS system fructose IIA component                                                                                                                                                                                                                                                       | <i>E. faecium</i><br><i>E. avium</i>                                          | (3) |
| Bacteriophage Minor                             | HMPREF0351_10870 | YP_006375476 | Phage minor structural protein.<br>A conserved domain found in a number of uncharacterized phage proteins.                                                                                                                                                                              | <i>E. faecium</i>                                                             | (3) |
| PspC                                            | HMPREF0351_12014 | YP_006376620 | PspC domain<br>Phage shock protein C (PspC) that is thought to be a transcriptional regulator.                                                                                                                                                                                          | <i>E. faecium</i>                                                             | (3) |
| LepB                                            | HMPREF0351_11130 | YP_006375736 | Signal peptidase I<br>This group of serine peptidases belong to MEROPS (peptidase database) peptidase family S26 (signal peptidase I family, clan SF), subfamily S26A.                                                                                                                  | <i>E. faecium</i>                                                             | (3) |
| Hypothetical Protein                            | HMPREF0351_11658 | YP_006376264 | Putative Lipoprotein<br>Prokaryotic membrane lipoprotein lipid attachment site.                                                                                                                                                                                                         | <i>E. faecium</i>                                                             | (3) |
| Aad                                             | HMPREF0351_10204 | YP_006374810 | Aldehyde-alcohol dehydrogenase<br>Bifunctional aldehyde-alcohol dehydrogenase                                                                                                                                                                                                           | <i>E. faecium</i><br><i>E. hirae</i><br><i>E. mundtii</i><br><i>E. durans</i> | (3) |
| NrdR                                            | HMPREF0351_10668 | YP_006375274 | Nicotinamide mononucleotide transporter PnuC<br>PnuC is a membrane protein responsible for nicotinamide mononucleotide transport<br>Members of this family are integral membrane proteins that are involved in transport of nicotinamide mononucleotide                                 | <i>E. faecium</i><br><i>E. durans</i>                                         | (3) |
| PTS IID                                         | HMPREF0351_12883 | YP_006377489 | PTS system<br>mannose/fructose/sorbose transporter subunit IID                                                                                                                                                                                                                          | <i>E. faecium</i>                                                             | (3) |
| EzrA                                            | HMPREF0351_12190 | YP_006376796 | Septation ring formation regulator EzrA<br>During the bacterial cell cycle, the tubulin-like cell-division protein FtsZ polymerizes into a ring structure that establishes the location of the nascent division site. EzrA modulates the frequency and position of FtsZ ring formation. | <i>E. faecium</i> .<br><i>E. durans</i><br><i>E. hirae</i>                    | (3) |
| AlfaMannosidase (Glycoside hydrolase family 38) | HMPREF0351_12498 | YP_006377104 | Glycoside hydrolase family 38 GH38. Comprises enzymes with only one known activity, alpha-mannosidase                                                                                                                                                                                   | <i>E. faecium</i>                                                             | (3) |

|                                |                  |              |                                                                                                                                                                                                                                                                                                          |                                                                                                                                           |        |
|--------------------------------|------------------|--------------|----------------------------------------------------------------------------------------------------------------------------------------------------------------------------------------------------------------------------------------------------------------------------------------------------------|-------------------------------------------------------------------------------------------------------------------------------------------|--------|
| Outer Surface Protein          | HMPREF0351_11298 | YP_006375904 | This predicted protein harbors two domains; <i>i</i> ) cyclophilin-like peptidyl-prolyl cis-trans isomerase domain Aldolase-type and <i>ii</i> ) a TIM barrel domain. Cyclophilins exhibit peptidyl-prolyl cis-trans isomerase (PPIase) activity. TIM barrel usually covers the entire protein structure | <i>E. faecium</i><br><i>E. faecalis</i><br><i>E. hirae</i><br><i>E. durans</i>                                                            | (3)    |
| Hypothetical Protein           | HMPREF0351_10875 | YP_006375481 | Conserved hypothetical protein<br>No significant domains                                                                                                                                                                                                                                                 | <i>E. faecium</i><br><i>E. mundtii</i>                                                                                                    | (3)    |
| Hypothetical protein           | HMPREF0351_10830 | YP_006375436 | Conserved hypothetical protein                                                                                                                                                                                                                                                                           | <i>E. faecium</i>                                                                                                                         | (3)    |
| RpeS – 5S                      | HMPREF0351_10075 | YP_006374681 | Ribosomal protein 5S                                                                                                                                                                                                                                                                                     | <i>E. faecalis</i><br><i>E. faecium</i><br><i>E. saccharolyticus</i><br><i>E. casseliflavus</i><br><i>E. villorum</i><br><i>E. caccae</i> | (4)    |
| BrnQ                           | HMPREF0351_10149 | YP_006374755 | LIVCS family branched chain amino acid:cation symporter Transport. All three of the branched chain aliphatic amino acids (leucine (L), isoleucine (I) and valine (V)). They function by a Na <sup>+</sup> or H <sup>+</sup> symport mechanism and display 12 putative transmembrane helical spanners.    | <i>E. faecalis</i><br><i>E. faecium</i>                                                                                                   | (4)    |
| RpoN                           | HMPREF0351_12069 | YP_006376675 | RNA polymerase sigma factor 54 (IPR000394)                                                                                                                                                                                                                                                               | <i>E. faecalis</i><br><i>E. faecium</i>                                                                                                   | (4)    |
| Hypothetical Protein EF1753    | HMPREF0351_12015 | YP_006376621 | Conserved hypothetical protein<br>No transmembrane domains,<br>No signal peptide.                                                                                                                                                                                                                        | <i>E. faecium</i>                                                                                                                         | (4)    |
| Hypothetical Protein EF1797    | HMPREF0351_10297 | YP_006374903 | Conserved hypothetical protein<br>5 - 6 transmembrane domains and signal-peptide                                                                                                                                                                                                                         | <i>E. faecium</i>                                                                                                                         | (4)    |
| Hypothetical Protein EF1797 -2 | HMPREF0351_10318 | YP_006374924 | Conserved hypothetical protein<br>5-6 transmembrane domains and signal-peptide                                                                                                                                                                                                                           | <i>E. faecium</i>                                                                                                                         | (4)    |
| TelA                           | HMPREF0351_10540 | YP_006375146 | This family consists of several prokaryotic TelA-like proteins. TelA and KIA are associated with tellurite resistance and plasmid fertility inhibition                                                                                                                                                   | <i>E. faecium</i><br><i>E. faecalis</i><br><i>E. hirae</i><br><i>E. mundtii</i><br><i>E. durans</i><br><i>E. villorum</i>                 | (4)    |
| MprF/FmtC                      | HMPREF0351_11082 | YP_006375688 | Lysylphosphatidylglycerol synthetase.<br>Proteins involved in the addition of lysine to phosphatidylglycerol (lysylphosphatidylglycerol synthetase.                                                                                                                                                      | <i>E. faecium</i><br><i>S. aureus</i>                                                                                                     | (5, 6) |

|      |                  |              |                                                                                                                                                                                                                                                                                                        |                                                                                                   |     |
|------|------------------|--------------|--------------------------------------------------------------------------------------------------------------------------------------------------------------------------------------------------------------------------------------------------------------------------------------------------------|---------------------------------------------------------------------------------------------------|-----|
| PgsA | HMPREF0351_12591 | YP_006377197 | CDP-diacylglycerol--glycerol-3-phosphate 3-phosphatidyltransferase<br>Catalyses the conversion of CDP-diacylglycerol and glycerol-3-phosphate to CMP and 3-(3-phosphatidyl)-glycerol 1-phosphate in the committed step to the synthesis of acidic phospholipids. It is an integral membrane protein.   | <i>E. faecium</i><br><i>E. hirae</i><br><i>E. mundtii</i><br><i>E. durans</i><br><i>S. aureus</i> | (7) |
| DltA | HMPREF0351_10751 | YP_006375357 | D-alanyl carrier protein ligase: DltA<br>A domain responsible for the specific recognition of amino acids and activation as adenylyl amino acids.                                                                                                                                                      | <i>S. aureus</i><br><i>E. faecium</i>                                                             | (6) |
| DltB | HMPREF0351_10752 | YP_006375358 | DltB is an alginate O-acetyltransferase AlgI/D-alanyl transfer D-alanyl transfer protein<br>It is predicted to be a transmembrane protein and is thought to be involved in the D-alanine incorporation into teichoic acids and in the transfer of activated D-alanine across the cytoplasmic membrane. | <i>E. faecium</i><br><i>S. aureus</i>                                                             | (6) |
| DltC | HMPREF0351_10753 | YP_006375359 | D-Alanyl carrier protein DltC.                                                                                                                                                                                                                                                                         | <i>E. faecium</i><br><i>S. aureus</i>                                                             | (6) |
| DltD | HMPREF0351_10754 | YP_006375360 | D-alanyl-lipoteichoic acid biosynthesis DltD: involved in the transfer of D-alanine from the membrane carrier to teichoic acids.                                                                                                                                                                       | <i>E. faecium</i><br><i>S. aureus</i>                                                             | (6) |

**Table S2. *E. faecium* homologues of predicted proteins associated with DAP resistance in *E. faecalis* and *S. aureus***

| Predicted protein | Organism                | Closest homolog in <i>E. faecium</i> DO | Amino acid identity (%) | Amino acid homology (%) | E value |
|-------------------|-------------------------|-----------------------------------------|-------------------------|-------------------------|---------|
| EF0224, RpsE      | <i>E. faecalis</i> V583 | HMPREF0351_10075                        | 98                      | 98                      | 4e-111  |
| EF0243, BrnQ      | <i>E. faecalis</i> V583 | HMPREF0351_10149                        | 67                      | 81                      | 00      |
| EF0782, RpoN      | <i>E. faecalis</i> V583 | HMPREF0351_12069                        | 63                      | 91                      | 00      |
| EF1753            | <i>E. faecalis</i> V583 | HMPREF0351_12015                        | 59                      | 74                      | 00      |
| EF1797            | <i>E. faecalis</i> V583 | HMPREF0351_10297                        | 46                      | 65                      | 1e-50   |
|                   |                         | HMPREF0351_10318                        | 43                      | 64                      | 1e-47   |
| EF2698, TelA      | <i>E. faecalis</i> V583 | HMPREF0351_10540                        | 83                      | 91                      | 00      |
| MprF/FmtC         | <i>S. aureus</i> COL    | HMPREF0351_11082                        | 30                      | 51                      | 4e-105  |
| PgsA              | <i>S. aureus</i> COL    | HMPREF0351_12591                        | 48                      | 65                      | 4e-52   |
| DltA              | <i>S. aureus</i> COL    | HMPREF0351_10751                        | 41                      | 59                      | 7e-120  |
| DltB              | <i>S. aureus</i> COL    | HMPREF0351_10752                        | 47                      | 63                      | 2e-105  |
| DltC              | <i>S. aureus</i> COL    | HMPREF0351_10753                        | 42                      | 77                      | 5e-19   |
| DltD              | <i>S. aureus</i> COL    | HMPREF0351_10754                        | 29                      | 50                      | 1e-47   |

**Table S3. More frequent amino acid (AA) substitutions in *E. faecium* strains**

| Predicted protein    | AA Change                        | # (%) of strains (Total=19) | DAP MIC/Range of MICs (µg/ml) | Strains                                |
|----------------------|----------------------------------|-----------------------------|-------------------------------|----------------------------------------|
| LiaS                 | Thr120→Ala                       | 7                           | 3 – 48                        | 503, 506, 513, R494, R497, V689, P1190 |
|                      | Leu70→Phe                        | 1                           | 4                             | 504                                    |
|                      | Asp251→Asn                       | 1                           | 6                             | 505                                    |
|                      | <b>Total</b>                     | <b>9(47%)</b>               | <b>3 - 48</b>                 |                                        |
| LiaR                 | Trp73→Cys                        | 7                           | 3-48                          | 503, 506, 513, R494, R497, V689, P1190 |
|                      | <b>Total</b>                     | <b>7(37%)</b>               | <b>3 - 48</b>                 |                                        |
| Cls                  | Arg218→Gln                       | 2                           | 16-32                         | R446, R501                             |
|                      | His215→Arg                       | 1                           | 48                            | R499                                   |
|                      | Asn13→Ile                        | 1                           | 32                            | R496                                   |
|                      | Insertion110 of Met-Pro-Leu      | 1                           | 16                            | R497                                   |
|                      | Asn237→Asp/Glu279→Gln            | 1                           | 6                             | 505                                    |
|                      | Gly181→Ser /Ser455→Leu           | 1                           | 4                             | 504                                    |
|                      | <b>Total</b>                     | <b>7(37%)</b>               | <b>4-48</b>                   |                                        |
| HD domain protein    | Ala151→Pro                       | 3                           | 4 – 48                        | 515, V689, R494                        |
|                      | Arg38→His                        | 1                           | 16                            | R446                                   |
|                      | His35→Pro/deletion of Ser36      | 1                           | 48                            | R501                                   |
|                      | <b>Total</b>                     | <b>5(26%)</b>               | <b>4-48</b>                   |                                        |
| LiaF                 | Asn110→Ser                       | 1                           | 6                             | 505                                    |
|                      | Ile142→Thr                       | 1                           | 32                            | R496                                   |
|                      | Leu39→Phe                        | 1                           | 48                            | R494                                   |
|                      | Thr35→Ile                        | 1                           | 4                             | 504                                    |
|                      | <b>Total</b>                     | <b>4(21%)</b>               | <b>4-48</b>                   |                                        |
| RrmA                 | Ala576→Gly                       | 1                           | 6                             | 505                                    |
|                      | Glu204→Val                       | 1                           | 4                             | 504                                    |
|                      | Ser76→Tyr                        | 1                           | 16                            | R44                                    |
|                      | <b>Total</b>                     | <b>3(16%)</b>               | <b>4-16</b>                   |                                        |
| Yych                 | Asn429→Ser                       | 1                           | 6                             | 506                                    |
|                      | Asp311→Glu                       | 1                           | 48                            | R501                                   |
|                      | Gly386→Arg                       | 1                           | 4                             | 504                                    |
|                      | <b>Total</b>                     | <b>3(16%)</b>               | <b>4-48</b>                   |                                        |
| Hypothetical Protein | Ala12→Thr / Leu14→Phe            | 1                           | 6                             | 506                                    |
|                      | Del55→Thr / Glu56→Val            | 1                           | 3                             | P1190                                  |
|                      | <b>Total</b>                     | <b>3(16%)</b>               | <b>3-6</b>                    |                                        |
| RpoN                 | Arg224→Gln                       | 1                           | 4                             | 504                                    |
|                      | Del AA1-87                       | 1                           | 48                            | R501                                   |
|                      | Pro137→Ser/Glu322→Lys/Asn444→His | 1                           | 6                             | 505                                    |
|                      | <b>Total</b>                     | <b>3(16%)</b>               | <b>4-48</b>                   |                                        |

|                                                  |                                                   |                |              |       |
|--------------------------------------------------|---------------------------------------------------|----------------|--------------|-------|
| TelA                                             | Asp20→Tyr                                         | 1              | 6            | 506   |
|                                                  | Leu299→Phe                                        | 2              | 4            | 513   |
|                                                  | <b>Total</b>                                      | <b>3(16%)</b>  | <b>4-6</b>   |       |
| Cfa                                              | Gly292→Ala                                        | 1              | 2            | S447  |
|                                                  | Tyr7→Cys                                          | 1              | 4            | 509   |
|                                                  | <b>Total</b>                                      | <b>2(11%)</b>  | <b>2-4</b>   |       |
| PTS- EIIA                                        | Lys111→Asn                                        | 1              | 2            | S447  |
|                                                  | Pro14→Ser /Asp34→Asn                              | 1              | 6            | 505   |
|                                                  | <b>Total</b>                                      | <b>2(11%)</b>  | <b>2-6</b>   |       |
| YycG/Walk/Vic K                                  | Ala414→Thr                                        | 1              | 3            | 515   |
|                                                  | Ser333→Leu                                        | 1              | 16           | R446  |
|                                                  | <b>Total</b>                                      | <b>2(11%)</b>  | <b>3-16</b>  |       |
| YycI                                             | Asn185→Ser                                        | 1              | 6            | 505   |
|                                                  | Gly228→Glu                                        | 1              | 24           | R499  |
|                                                  | <b>Total</b>                                      | <b>2(11%)</b>  | <b>6-24</b>  |       |
| Bacteriophage minor structural protein           | >17 changes                                       | 1              | 3            | P1190 |
|                                                  | 5 changes                                         | 1              | 4            | 510   |
|                                                  | <b>Total</b>                                      | <b>2(11%)</b>  | <b>3-4</b>   |       |
| Aad (aldehyde alcohol dehydrogenase)             | Asp161→Ala                                        | 1              | 4            | 504   |
|                                                  | Val121→Gly                                        | 1              | 6            | 506   |
|                                                  | <b>Total</b>                                      | <b>2(11%)</b>  | <b>4-6</b>   |       |
| Alfa Mannosidase (Glycoside hydrolase family 38) | Gln767→His                                        | 1              | 4            | 504   |
|                                                  | >9changes                                         | 1              | 6            | 505   |
|                                                  | <b>Total</b>                                      | <b>2(11%)</b>  | <b>4-6</b>   |       |
| Hypothetical Protein                             | Arg96→Ser                                         | 1              | 4            | 504   |
|                                                  | Thr29→Ala/His44→Arg/Ser55→Arg/Met62→Thr/Leu61→Ile | 1              | 6            | 505   |
|                                                  | <b>Total</b>                                      | <b>2(11%)</b>  | <b>4-6</b>   |       |
| MprF                                             | Thr416→Pro                                        | 1              | 4            | 504   |
|                                                  | Lys744→Glu /Ala760→Ser                            | 1              | 6            | 505   |
|                                                  | <b>Total</b>                                      | <b>2 (11%)</b> | <b>4 - 6</b> |       |
| GdpD                                             | Ile283→Phe                                        | 1              | 48           | R494  |
|                                                  | <b>Total</b>                                      | <b>1 (5%)</b>  | <b>48</b>    |       |
| SulP                                             | Hys151→Tyr                                        | 1              | 16           | R446  |
|                                                  | <b>Total</b>                                      | <b>1 (5%)</b>  | <b>16</b>    |       |
| XpaC                                             | Asp198→His                                        | 1              | 2            | S447  |
|                                                  | <b>Total</b>                                      | <b>1 (5%)</b>  | <b>2</b>     |       |
| PspC                                             | Lys3→Glu                                          | 1              | 64           | R494  |
|                                                  | <b>Total</b>                                      | <b>1 (5%)</b>  | <b>64</b>    |       |
| LepB                                             | Truncated                                         | 1              | 32           | R496  |
|                                                  | <b>Total</b>                                      | <b>1 (5%)</b>  | <b>32</b>    |       |
| NrdR                                             | Phe122→Leu                                        | 1              | 4            | 510   |
|                                                  | <b>Total</b>                                      | <b>1 (5%)</b>  | <b>4</b>     |       |
| PTS IID                                          | Ile43→Met                                         | 1              | 6            | 505   |
|                                                  | <b>Total</b>                                      | <b>1 (5%)</b>  | <b>6</b>     |       |
| EzrA                                             | Ile9→Met/Thr326→Ala                               | 1              | 6            | 505   |
|                                                  | <b>Total</b>                                      | <b>1 (5%)</b>  | <b>6</b>     |       |
| BrnQ                                             | Val134→Gly /Leu409→Ile                            | 1              | 6            | 505   |
|                                                  | <b>Total</b>                                      | <b>1 (5%)</b>  | <b>6</b>     |       |
| Hypothetical                                     | Ala290→Ser                                        | 1              | 4            | 504   |

|         |              |               |          |     |
|---------|--------------|---------------|----------|-----|
| protein | <b>Total</b> | <b>1 (5%)</b> | <b>4</b> |     |
| DltA    | Glu177→Lys   | 1             | 6        | 505 |
|         | <b>Total</b> | <b>1 (5%)</b> | <b>6</b> |     |
| DltD    | Ser410→Asp   | 1             | 6        | 505 |
|         | <b>Total</b> | <b>1 (5%)</b> | <b>6</b> |     |

## References

1. **Arias, C. A., D. Panesso, D. M. McGrath, X. Qin, M. F. Mojica, C. Miller, L. Diaz, T. T. Tran, S. Rincon, E. M. Barbu, J. Reyes, J. H. Roh, E. Lobos, E. Sodergren, R. Pasqualini, W. Arap, J. P. Quinn, Y. Shamoo, B. E. Murray, and G. M. Weinstock.** 2011. Genetic basis for *in vivo* daptomycin resistance in enterococci. *The New England journal of medicine* **365**:892-900.
2. **Tran, T. T., D. Panesso, H. Gao, J. H. Roh, J. M. Munita, J. Reyes, L. Diaz, E. A. Lobos, Y. Shamoo, N. N. Mishra, A. S. Bayer, B. E. Murray, G. M. Weinstock, and C. A. Arias.** 2013. Whole-genome analysis of a daptomycin-susceptible *Enterococcus faecium* strain and its daptomycin-resistant variant arising during therapy. *Antimicrob Agents Chemother.* **57**:261-268.
3. **Humphries, R. M., T. Kelesidis, R. Tewhey, W. E. Rose, N. Schork, V. Nizet, and G. Sakoulas.** 2012. Genotypic and phenotypic evaluation of the evolution of high-level daptomycin nonsusceptibility in vancomycin-resistant *Enterococcus faecium*. *Antimicrob Agents Chemother.* **56**:6051-6053.
4. **Palmer, K. L., A. Daniel, C. Hardy, J. Silverman, and M. S. Gilmore.** 2011. Genetic basis for daptomycin resistance in enterococci. *Antimicrob Agents Chemother.* **55**:2245-2256.
5. **Bao, Y., T. Sakinc, D. Laverde, D. Wobser, A. Benachour, C. Theilacker, A. Hartke, and J. Huebner.** 2012. Role of *mprF1* and *mprF2* in the pathogenicity of *Enterococcus faecalis*. *Plos One* **7**:e38458.
6. **Bayer, A. S., T. Schneider, and H. G. Sahl.** 2013. Mechanisms of daptomycin resistance in *Staphylococcus aureus*: role of the cell membrane and cell wall. *Ann N Y Acad Sci* **1277**:139-158.
7. **Peleg, A. Y., S. Miyakis, D. V. Ward, A. M. Earl, A. Rubio, D. R. Cameron, S. Pillai, R. C. J. Moellering, and G. M. Eliopoulos.** 2012. Whole genome characterization of the mechanisms of daptomycin resistance in clinical and laboratory derived isolates of *Staphylococcus aureus*. *Plos One* **7**:e28316.
